# Supplementary material for: Humidity-dependent dielectric and electrical behavior of magnesium iron vanadate (Mg2FeVO6) ceramics
Source: Royal Society of Chemistry journal article supplement (doi:10.1039/d6ra02584f), 2026-05-11
Supplement: d6ra02584f1.pdf [file d6ra02584f1.pdf]

### Table S1, Figure S1 and Table S2— Supplementary Materials

**Table S1.** Complete XRD peak indexing for all 25 peaks identified in the 10–90° 2 $\theta$  range, from geometric indexing. DP = double perovskite-related structure Ia- $\bar{3}d$  (Phase A: a = 10.098 Å refined, 10.128 Å geometric; Phase B: a = 10.402 Å refined, 10.311 Å geometric); d<sub>calc</sub> values in this table use geometric parameters as the indexing basis; refined parameters are reported in Table 2 of the main text; MP = Mg<sub>2</sub>V<sub>2</sub>O<sub>7</sub> secondary phase (ICDD 00-029-0877); O = ordering reflection (forbidden in Pm- $\bar{3}m$ ); F = fundamental; sec = secondary phase; ★ = among strongest peaks; † = error at or exceeding  $\pm 2.5\%$  tolerance boundary; Peak 5 at  $\Delta = +2.77\%$  and Peak 6 at  $\Delta = -2.42\%$  are assigned on the basis of intensity magnitude and the complete absence of alternative candidate phases at these positions, rather than d-spacing agreement alone; fund. = fundamental (permitted in Pm- $\bar{3}m$ ).  $\Delta\% = 100 \times (d_{\text{obs}} - d_{\text{calc}})/d_{\text{calc}}$ . Deviations within  $\pm 2.5\%$  are consistent with the precision of geometric indexing for laboratory XRD data.

| No. | 2 $\theta_{\text{obs}}$ (°) | d <sub>obs</sub> (Å) | I (%)  | Phase | hkl                   | d <sub>calc</sub> (Å) | $\Delta$ (%) | Type | Note                                          |
|-----|-----------------------------|----------------------|--------|-------|-----------------------|-----------------------|--------------|------|-----------------------------------------------|
| 1   | 17.349                      | 5.1075               | 15.13  | MP    | ( $\bar{1}\bar{1}0$ ) | 5.1260                | -0.36        | sec  | Mg <sub>2</sub> V <sub>2</sub> O <sub>7</sub> |
| 2   | 21.525                      | 4.1249               | 16.07  | DP-A  | (211)                 | 4.1346                | -0.23        | O    |                                               |
| 3   | 22.728                      | 3.9093               | 7.21   | MP    | (101)                 | 3.8963                | +0.33        | sec  | Mg <sub>2</sub> V <sub>2</sub> O <sub>7</sub> |
| 4   | 24.156                      | 3.6814               | 24.18  | MP    | ( $\bar{3}11$ )       | 3.6940                | -0.34        | sec  | Mg <sub>2</sub> V <sub>2</sub> O <sub>7</sub> |
| 5   | 27.070                      | 3.2913               | 94.70  | DP-A  | (310)                 | 3.2026                | +2.77        | O    | ★ †                                           |
| 6   | 28.023                      | 3.1815               | 50.73  | DP-B  | (310)                 | 3.2606                | -2.42        | O    | ★ †                                           |
| 7   | 29.485                      | 3.0270               | 15.43  | DP-B  | (222)                 | 2.9765                | +1.70        | F    | fund.                                         |
| 8   | 30.157                      | 2.9611               | 12.46  | DP-A  | (222)                 | 2.9236                | +1.28        | F    | fund.                                         |
| 9   | 32.447                      | 2.7571               | 11.64  | DP-B  | (321)                 | 2.7557                | +0.05        | O    |                                               |
| 10  | 33.190                      | 2.6971               | 67.60  | DP-A  | (321)                 | 2.7067                | -0.36        | O    | ★                                             |
| 11  | 35.622                      | 2.5183               | 100.00 | DP-A  | (400)                 | 2.5319                | -0.54        | F    | fund.                                         |
| 12  | 40.905                      | 2.2045               | 25.46  | DP-A  | (332)                 | 2.1592                | +2.10        | O    | †                                             |
| 13  | 43.248                      | 2.0903               | 7.89   | DP-A  | (422)                 | 2.0673                | +1.11        | F    | fund.                                         |
| 14  | 44.859                      | 2.0189               | 1.55   | DP-B  | (431)                 | 2.0221                | -0.16        | O    |                                               |
| 15  | 46.528                      | 1.9503               | 4.58   | DP-A  | (431)                 | 1.9862                | -1.81        | O    |                                               |
| 16  | 47.882                      | 1.8983               | 5.91   | DP-B  | (521)                 | 1.8825                | +0.84        | O    |                                               |
| 17  | 49.483                      | 1.8405               | 24.21  | DP-A  | (521)                 | 1.8490                | -0.46        | O    |                                               |
| 18  | 54.053                      | 1.6952               | 25.56  | DP-A  | (442)                 | 1.6879                | +0.43        | F    | fund.                                         |
| 19  | 57.582                      | 1.5994               | 5.22   | DP-A  | (620)                 | 1.6013                | -0.12        | F    | fund.                                         |
| 20  | 62.544                      | 1.4839               | 31.50  | DP-A  | (631)                 | 1.4932                | -0.62        | O    |                                               |
| 21  | 64.006                      | 1.4535               | 19.32  | DP-A  | (444)                 | 1.4618                | -0.57        | F    | fund.                                         |
| 22  | 65.412                      | 1.4256               | 3.33   | DP-A  | (543)                 | 1.4323                | -0.46        | O    |                                               |
| 23  | 71.982                      | 1.3108               | 6.60   | DP-A  | (730)                 | 1.3298                | -1.43        | O    |                                               |
| 24  | 75.458                      | 1.2588               | 4.76   | DP-A  | (800)                 | 1.2659                | -0.56        | F    | fund.                                         |

| No. | $2\theta_{\text{obs}}$ (°) | $d_{\text{obs}}$ (Å) | I (%) | Phase | hkl   | $d_{\text{calc}}$ (Å) | $\Delta$ (%) | Type | Note |
|-----|----------------------------|----------------------|-------|-------|-------|-----------------------|--------------|------|------|
| 25  | 84.956                     | 1.1407               | 4.06  | DP-A  | (752) | 1.1467                | -0.53        | O    |      |

Summary statistics: total peaks: 25 | indexed to  $\text{Mg}_2\text{FeVO}_6$ : 22/25 (88%) | indexed to  $\text{Mg}_2\text{V}_2\text{O}_7$ : 3/25 (12%) | within  $\pm 2.0\%$ : 19/22 (86%) | at  $\pm 2.0$ – $2.5\%$ : 3/22 (14%, Peaks 5, 6, 12) | ordering reflections: 14 total by geometric analysis (10 Phase A, 4 Phase B); 12 resolved by Le Bail profile fitting (10 Phase A, 2 Phase B) — see Table 2 and main text for reconciliation | fundamental reflections: 8 total.

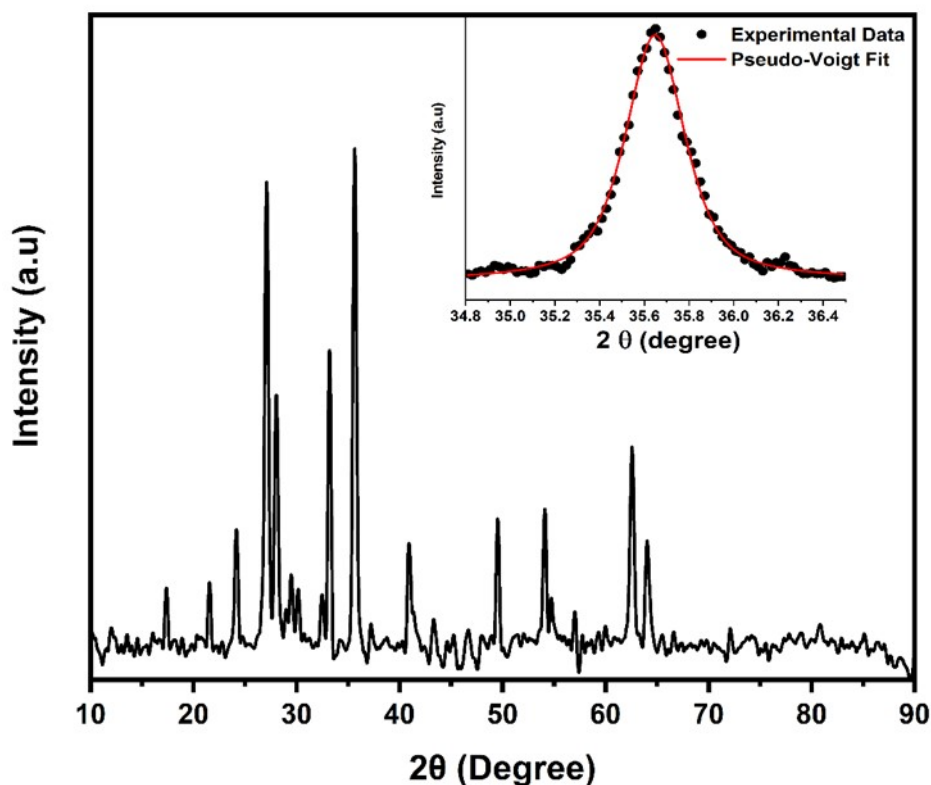

**Figure S1.** Observed XRD pattern of the magnesium iron vanadate ceramic sintered at 900°C, inset: pseudo-Voigt profile fitting of the isolated (400) fundamental reflection of Phase A at  $2\theta = 35.622^\circ$  ( $R^2 = 0.995$ ), used for crystallite size determination via the Scherrer equation yielding  $D = 26.1$  nm.

**Table S2.** Complete peak assignment from Le Bail profile fitting, Peak 7 ( $29.485^\circ$ , DP-B 222,  $I = 15.43\%$  in geometric indexing) is not resolved in the Le Bail profile refinement due to overlap with  $\text{Mg}_2\text{V}_2\text{O}_7$  contributions at  $\sim 29.0$ – $30.2^\circ$  (Peaks 6, 7, 8 in S1). The 20-peak Le Bail range (17– $90^\circ$ ) excludes this region from reliable profile fitting.

| No. | $2\theta_{\text{obs}}$ (°) | $2\theta_{\text{calc}}$ (°) | $d_{\text{obs}}$ (Å) | $d_{\text{calc}}$ (Å) | $\Delta$ (%) | $I/I_0$ (%) | hkl   | Phase / Assignment                            |
|-----|----------------------------|-----------------------------|----------------------|-----------------------|--------------|-------------|-------|-----------------------------------------------|
| 1   | 17.362                     | 17.499                      | 5.104                | 5.064                 | 0.78         | 13.7        | (200) | A (fund.) + $\text{Mg}_2\text{V}_2\text{O}_7$ |
| 2   | 21.541                     | 21.538                      | 4.122                | 4.123                 | -0.01        | 15.3        | (211) | A (fund.)                                     |
| 3   | 24.172                     | 24.176                      | 3.679                | 3.679                 | 0.00         | 23.4        | (220) | B (fund.)                                     |
| 4   | 27.094                     | 27.096                      | 3.289                | 3.288                 | 0.01         | 93.8        | (310) | B (fund.) — 2nd strongest peak                |
| 5   | 28.043                     | 28.054                      | 3.179                | 3.178                 | 0.04         | 42.5        | (310) | A (fund.)                                     |

|    |        |        |       |       |       |       |        |                                                         |
|----|--------|--------|-------|-------|-------|-------|--------|---------------------------------------------------------|
| 6  | 28.990 | ~29.0  | 3.078 | —     | —     | 3.9   | —      | Mg <sub>2</sub> V <sub>2</sub> O <sub>7</sub>           |
| 7  | 29.492 | ~29.5  | 3.026 | —     | —     | 9.8   | —      | Mg <sub>2</sub> V <sub>2</sub> O <sub>7</sub>           |
| 8  | 30.167 | ~30.2  | 2.960 | —     | —     | 8.2   | —      | Mg <sub>2</sub> V <sub>2</sub> O <sub>7</sub>           |
| 9  | 32.491 | —      | 2.754 | —     | —     | 3.5   | —      | Mg <sub>2</sub> V <sub>2</sub> O <sub>7</sub> / Phase B |
| 10 | 33.210 | 33.279 | 2.695 | 2.690 | -0.22 | 65.2  | (321)* | A (ORD) — 3rd<br>strongest                              |
| 11 | 35.649 | 35.649 | 2.517 | 2.525 | -0.32 | 100.0 | (400)  | A (fund.) — strongest<br>peak                           |
| 12 | 40.924 | 41.119 | 2.203 | 2.190 | 0.62  | 22.7  | (332)  | A (fund.)                                               |
| 13 | 43.285 | ~43.3  | 2.089 | —     | —     | 8.9   | —      | Mg <sub>2</sub> V <sub>2</sub> O <sub>7</sub>           |
| 14 | 49.538 | 49.541 | 1.839 | 1.839 | 0.01  | 26.4  | (521)  | A (fund.)                                               |
| 15 | 54.101 | 54.051 | 1.694 | 1.695 | -0.09 | 23.4  | (600)* | A (ORD)                                                 |
| 16 | 54.712 | —      | 1.676 | —     | —     | 1.8   | —      | A (600)* weak                                           |
| 17 | 57.110 | —      | 1.612 | —     | —     | 7.5   | —      | Overlap region                                          |
| 18 | 57.726 | 57.669 | 1.596 | 1.597 | -0.09 | 4.5   | (620)  | A (fund.)                                               |
| 19 | 62.572 | 62.502 | 1.483 | 1.485 | -0.09 | 33.4  | (631)* | A (ORD)                                                 |
| 20 | 64.068 | 64.092 | 1.452 | 1.452 | 0.03  | 18.0  | (444)  | A (fund.)                                               |
